# Supplementary material
Source: PubMed Central journal article supplement (PMC4646173)
Supplement: supp_M115.668384_jbc.M115.668384-1.pdf [file supp_M115.668384_jbc.M115.668384-1.pdf]

## Supplementary Information

### Structural basis for Ca<sup>2+</sup>-mediated interaction of the perforin C2 domain with lipid membranes

Hiromasa Yagi<sup>1,§</sup>, Paul J. Conroy<sup>2,3,§</sup>, Eleanor W. W. Leung<sup>1</sup>, Ruby H. P. Law<sup>2,3</sup>, Joseph A. Trapani<sup>4,5</sup>, Ilia Voskoboinik<sup>4,5,6</sup>, James C. Whisstock<sup>2,3</sup> and Raymond S. Norton<sup>1,\*</sup>

<sup>1</sup>Monash Institute of Pharmaceutical Sciences, Monash University, Parkville, VIC 3052, Australia,

<sup>2</sup>Department of Biochemistry and Molecular Biology, Monash University, Clayton, VIC 3800, Australia.

<sup>3</sup>ARC Centre of Excellence in Advanced Molecular Imaging, Monash University, Clayton, VIC 3800, Australia.

<sup>4</sup>Cancer Immunology Program, Peter MacCallum Cancer Centre, VIC 3002, Australia.

<sup>5</sup>Microbiology and Immunology, The University of Melbourne, VIC 3052, Australia.

<sup>6</sup>Department of Genetics and Department of Pathology, The University of Melbourne, VIC 3052, Australia.

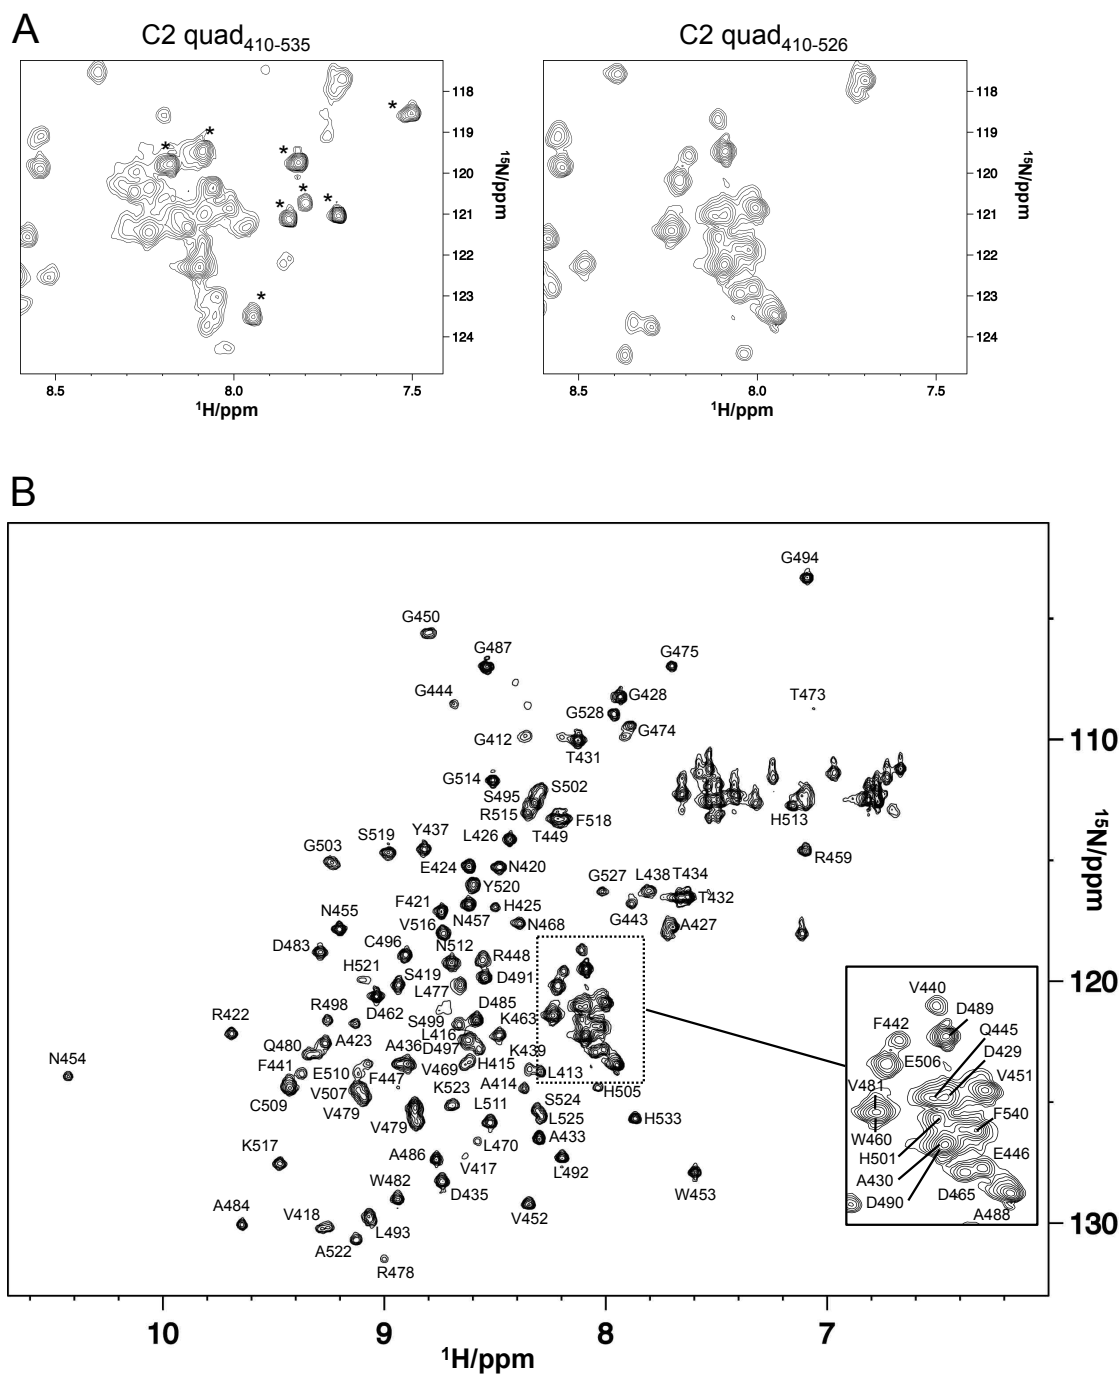

**Figure S1.**  $^1\text{H}$ - $^{15}\text{N}$  SOFAST-HMQC spectra of the crystal and the NMR constructs (A) Central regions of the 2D NMR spectra of the constructs for used for crystallography (C2 quad<sub>410-535</sub>; left) and NMR (C2 quad<sub>410-526</sub>; right) studies. In the C2 quad<sub>410-535</sub>, the cross-peaks of the extra residues at C-terminal (marked by asterisks) are observed as intense resonances in the regions of random-coil chemical shift, indicating highly flexible. (B) Backbone resonance assignments of the C2 quad<sub>410-526</sub>. The cross-peaks of

backbone amides are labelled with the amino acid type and sequence number; this construct consists of residues 410-526 with Gly + His<sub>6</sub> tag at C-terminal (Fig. 1 in the main text)

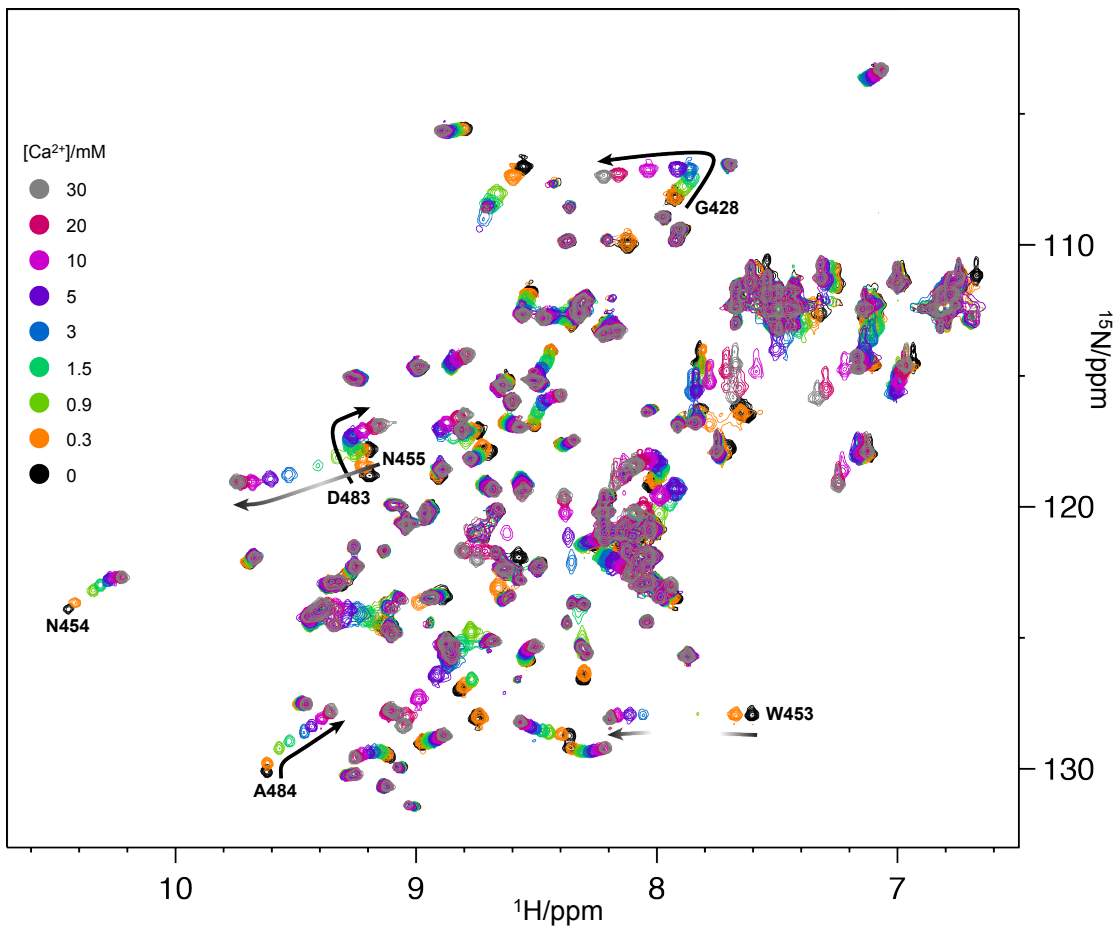

**Figure S2.** Titration of the C2 D491N mutant with  $\text{Ca}^{2+}$ . Overlay of  $^1\text{H}$ - $^{15}\text{N}$  SOFAST-HMQC spectra of  $150\ \mu\text{M}$   $^{15}\text{N}$ -labelled C2 D491N mutant recorded with increasing  $[\text{Ca}^{2+}]$ . Spectra were processed identically and plotted with the same contour levels. Resonance colours correspond to different  $[\text{Ca}^{2+}]$  shown in the same colour in the top-left corner. The chemical shift change patterns are shown as black arrows, and intensity changes are roughly represented by gradient.

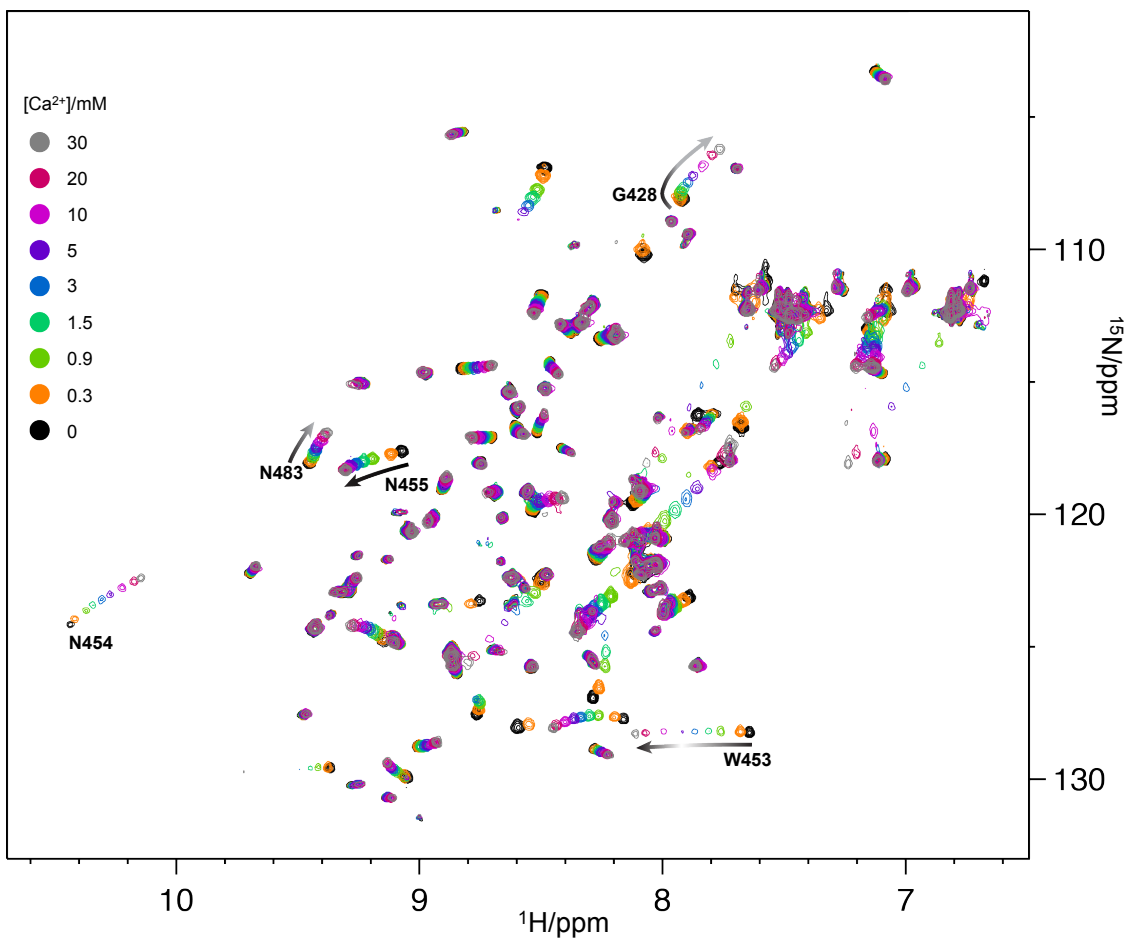

**Figure S3.** Titration of the C2 D483N mutant with  $\text{Ca}^{2+}$ . As per Figure S2, except for  $150\ \mu\text{M}$   $^{15}\text{N}$ -labelled C2 D483N mutant.

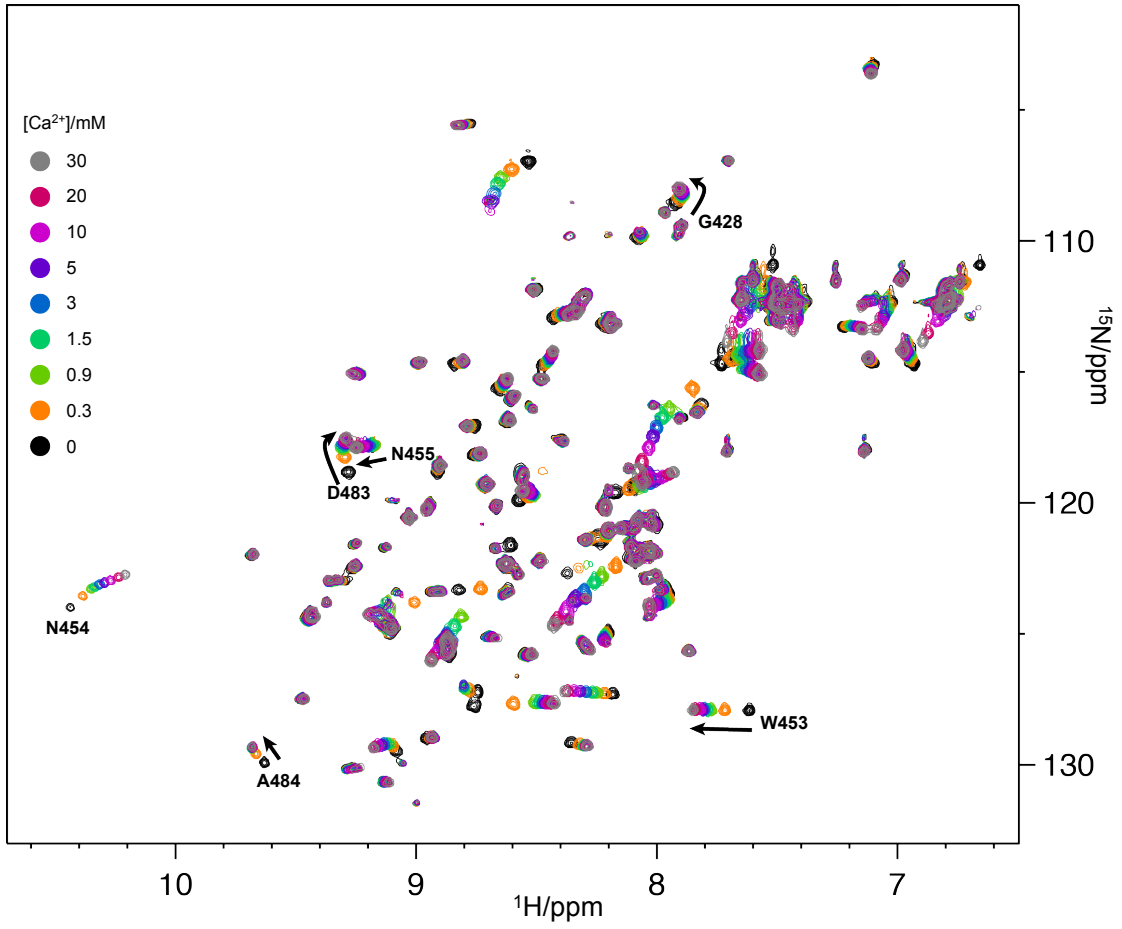

**Figure S4.** Titration of the C2 D429N mutant with  $\text{Ca}^{2+}$ . As per Figure S2, except for  $150 \mu\text{M}$   $^{15}\text{N}$ -labelled C2 D429N mutant.

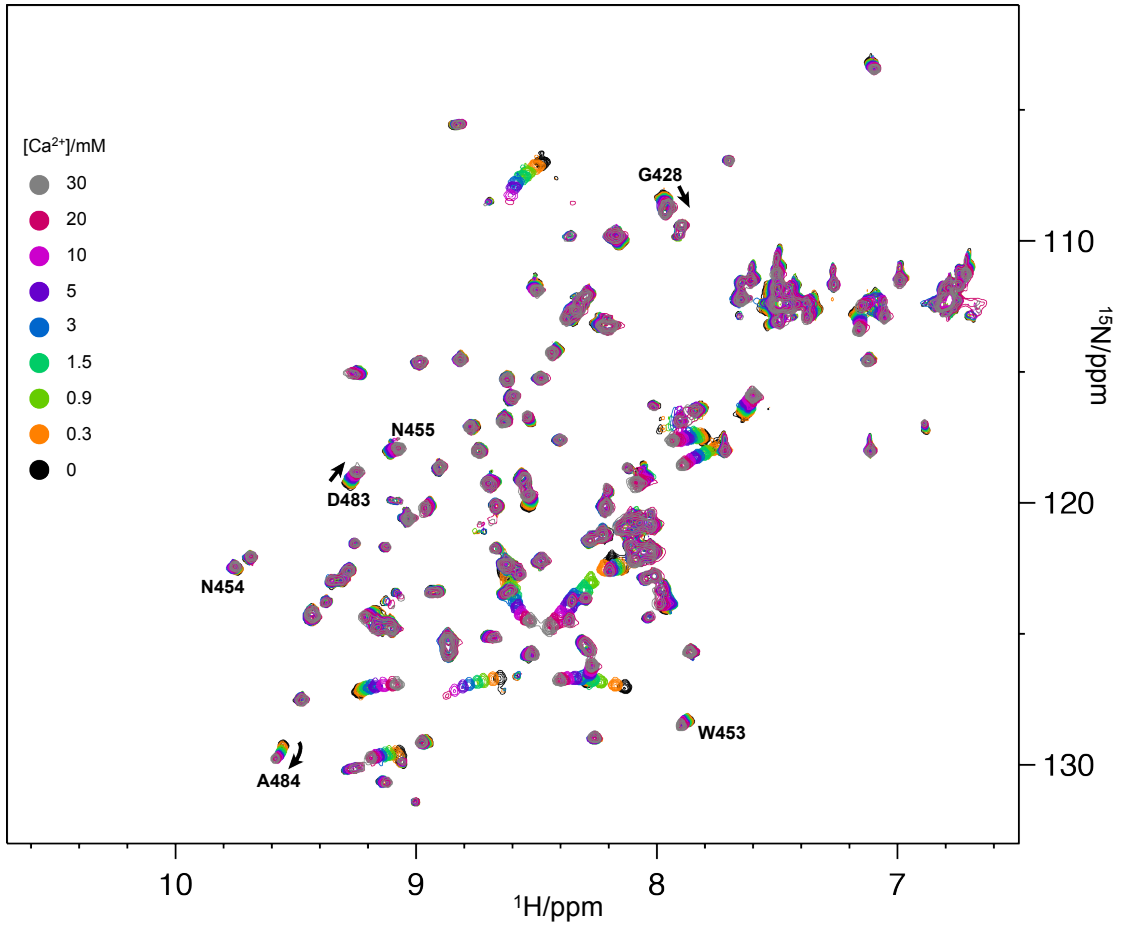

**Figure S5.** Titration of the C2 D435N mutant with  $\text{Ca}^{2+}$ . As per Figure S2, except for  $150 \mu\text{M}$   $^{15}\text{N}$ -labelled C2 D435N mutant.

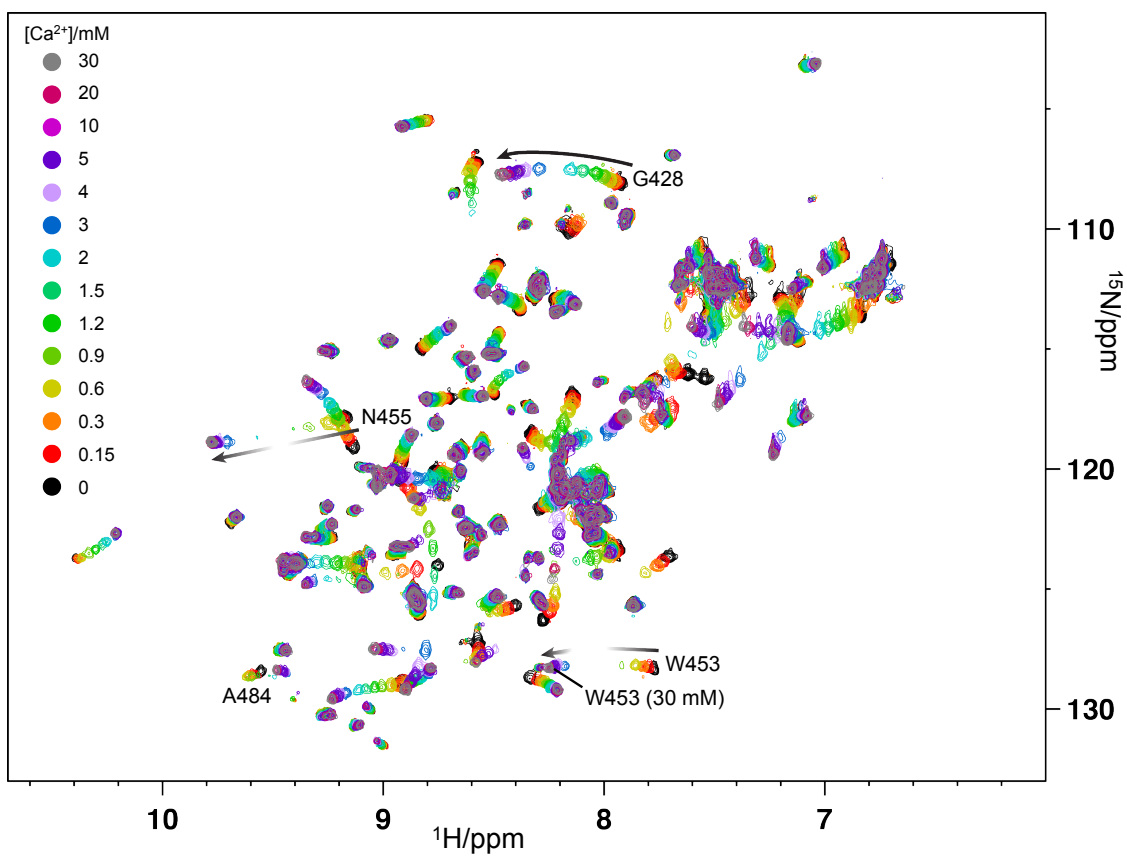

**Figure S6.** Titration of the C2 D490N mutant with  $\text{Ca}^{2+}$ . As per Figure S2, except for  $150 \mu\text{M}$   $^{15}\text{N}$ -labelled C2 D490N mutant.



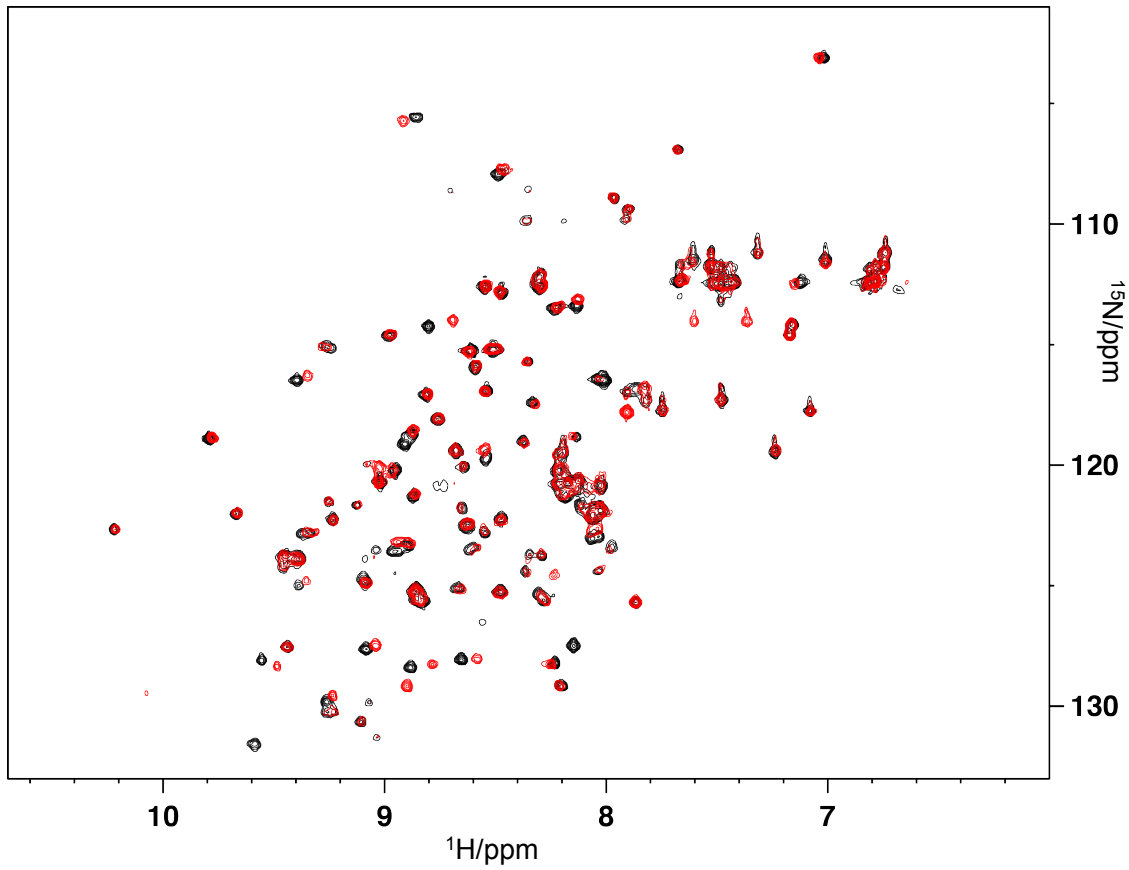

**Figure S7.** Comparison of C2 quad<sub>410-526</sub> with the C2 D490N mutant at 30 mM  $[\text{Ca}^{2+}]$ . Overlay of  $^1\text{H}$ - $^{15}\text{N}$  SOFAST-HMQC spectra of the C2 quad<sub>410-526</sub> (black) and the D490N mutant (red).

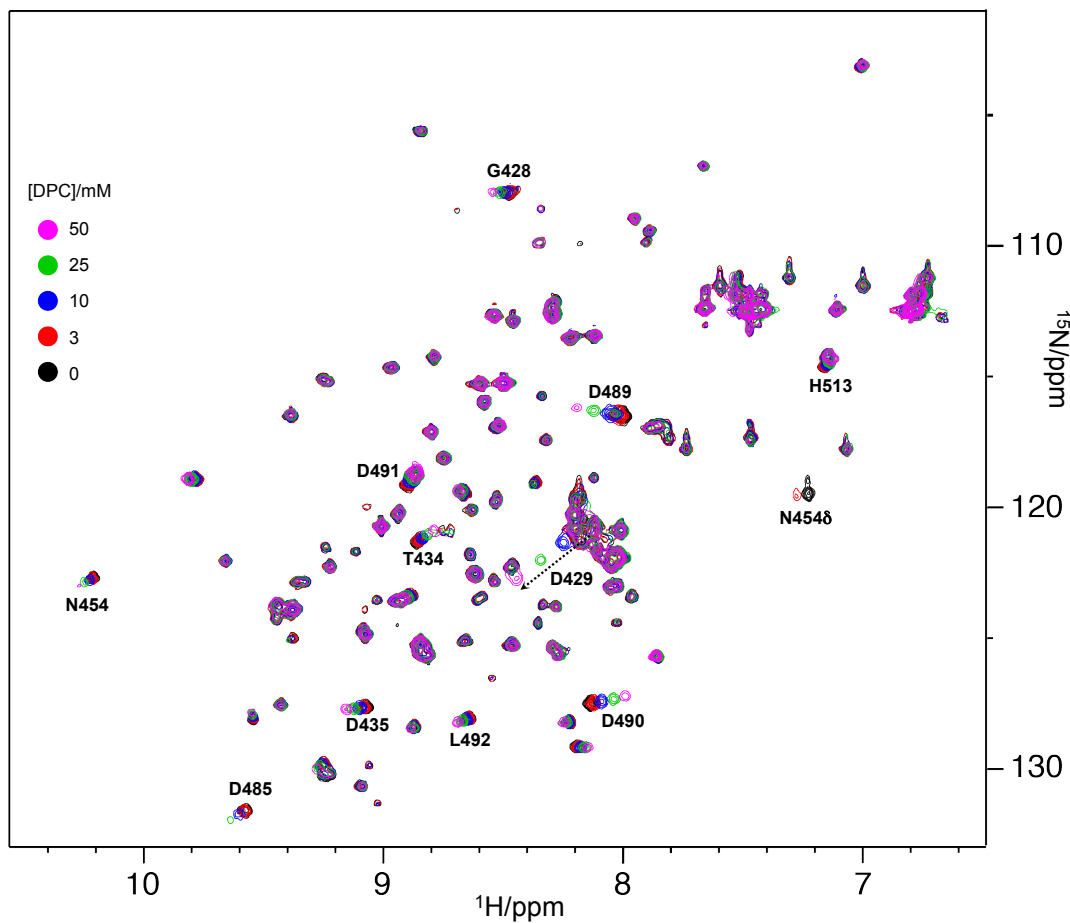

**Figure S8.** Titration of the C2 quad<sub>410-526</sub> with DPC in the presence of 30 mM [Ca<sup>2+</sup>]. Overlay of <sup>1</sup>H-<sup>15</sup>N SOFAST-HMQC spectra of 150 μM <sup>15</sup>N-labelled C2 quad<sub>410-526</sub> recorded with increasing [DPC] in the presence of 30 mM [Ca<sup>2+</sup>]. Resonance colours correspond to different [DPC] as shown at the left of the spectra. Significantly perturbed resonances upon addition of DPC are labelled.

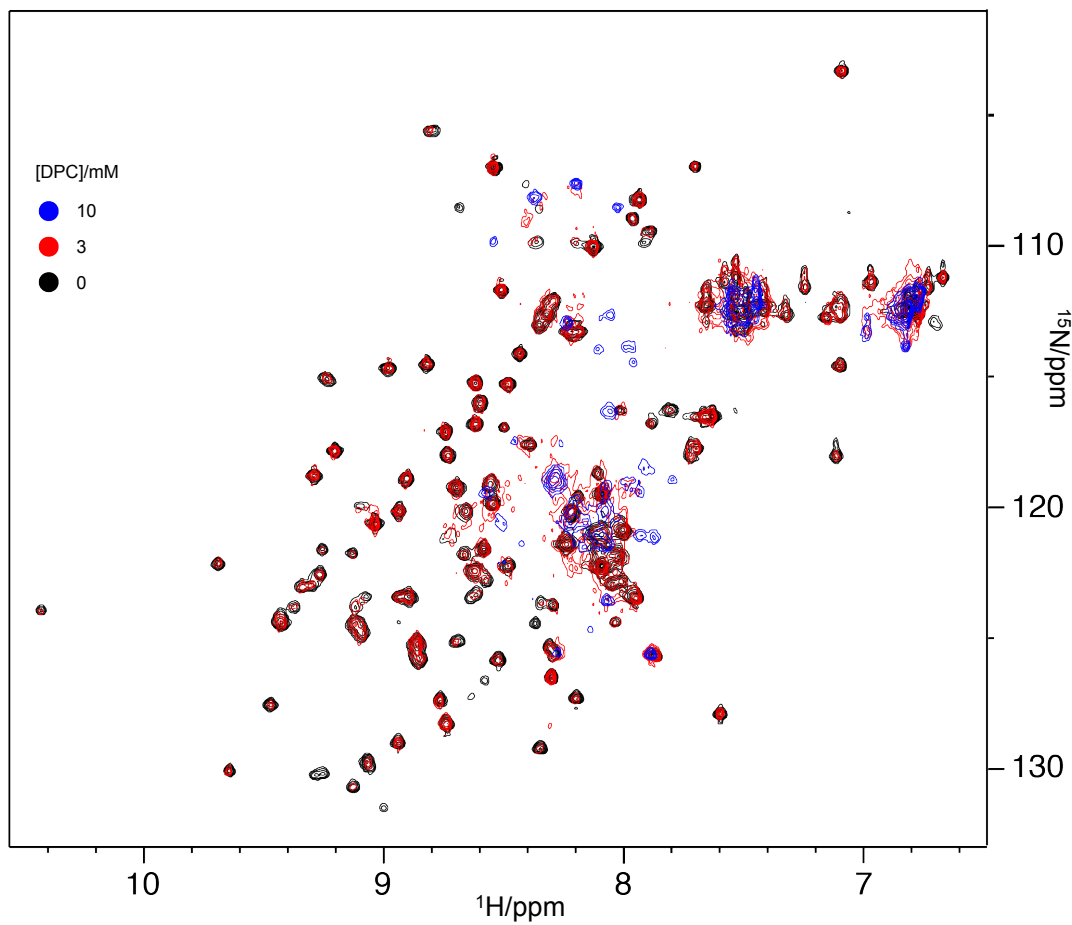

**Figure S9.** Titration of the C2 quad<sub>410-526</sub> with DPC in the absence of  $\text{Ca}^{2+}$ . Overlay of  $^1\text{H}$ - $^{15}\text{N}$  SOFAST-HMQC spectra of  $150\ \mu\text{M}$   $^{15}\text{N}$ -labelled C2 quad<sub>410-526</sub> recorded with increasing [DPC]. Resonance colours correspond to different [DPC] as shown at the left of the spectra. Resonances indicative of degradation or aggregation appeared in the central region of the spectra at 3 mM [DPC] and intensified at 10 mM [DPC].

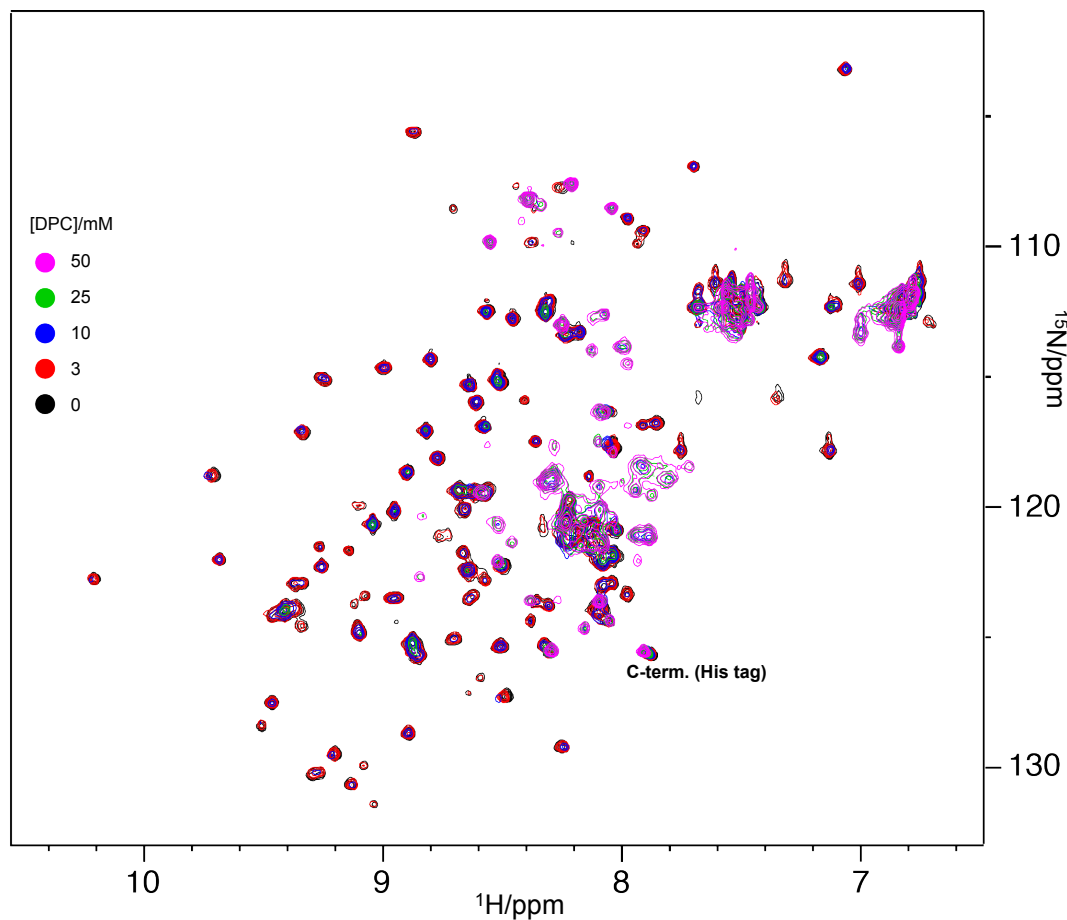

**Figure S10.** Titration of the C2 quad<sub>410-526</sub> with DPC in the presence of 2 mM [Ca<sup>2+</sup>]. Overlay of <sup>1</sup>H-<sup>15</sup>N SOFAST-HMQC spectra of 150 μM <sup>15</sup>N-labelled C2 quad mutant recorded with increasing [DPC]. Resonance colours correspond to different [DPC] as shown at the left of the spectra. No significant CSPs were observed upon adding DPC except for the C-terminal residue, but, the C-terminus is not near the CBRs, indicating non-specific interaction with DPC micelles. In addition, resonances indicative of degradation or aggregation gradually increased with increasing [DPC].

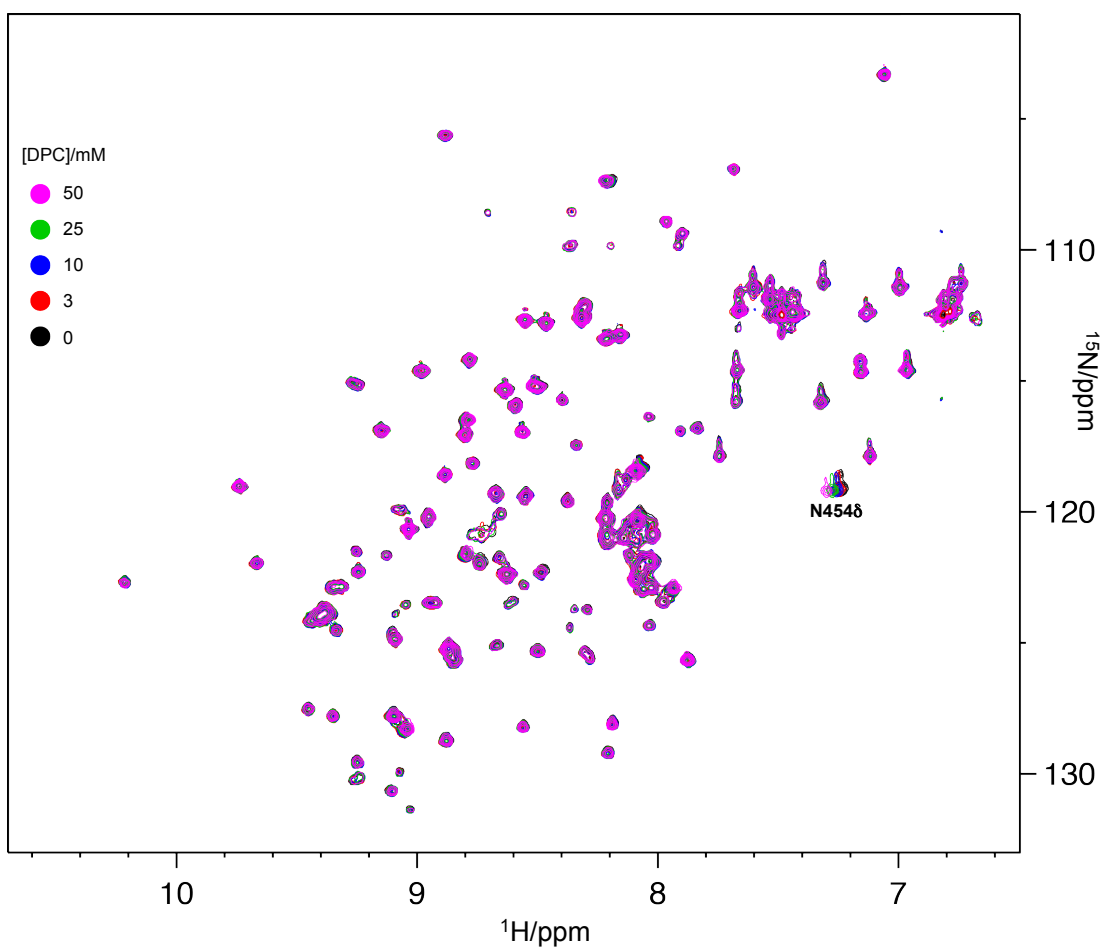

**Figure S11.** Interaction of the C2 D491N mutant with DPC micelles. Overlay of  $^1\text{H}$ - $^{15}\text{N}$  SOFAST-HMQC spectra of  $150\ \mu\text{M}$   $^{15}\text{N}$ -labelled C2 D491N mutant recorded with increasing [DPC] at  $30\ \text{mM}$   $[\text{Ca}^{2+}]$ . Spectra were processed identically and plotted with the same contour levels. Resonance colours correspond to different [DPC] shown in the same colour on the left side of spectra. No significant CSPs upon adding DPC were observed in the resonances of backbone amides, but a side chain amide resonance of N454 was clearly perturbed.

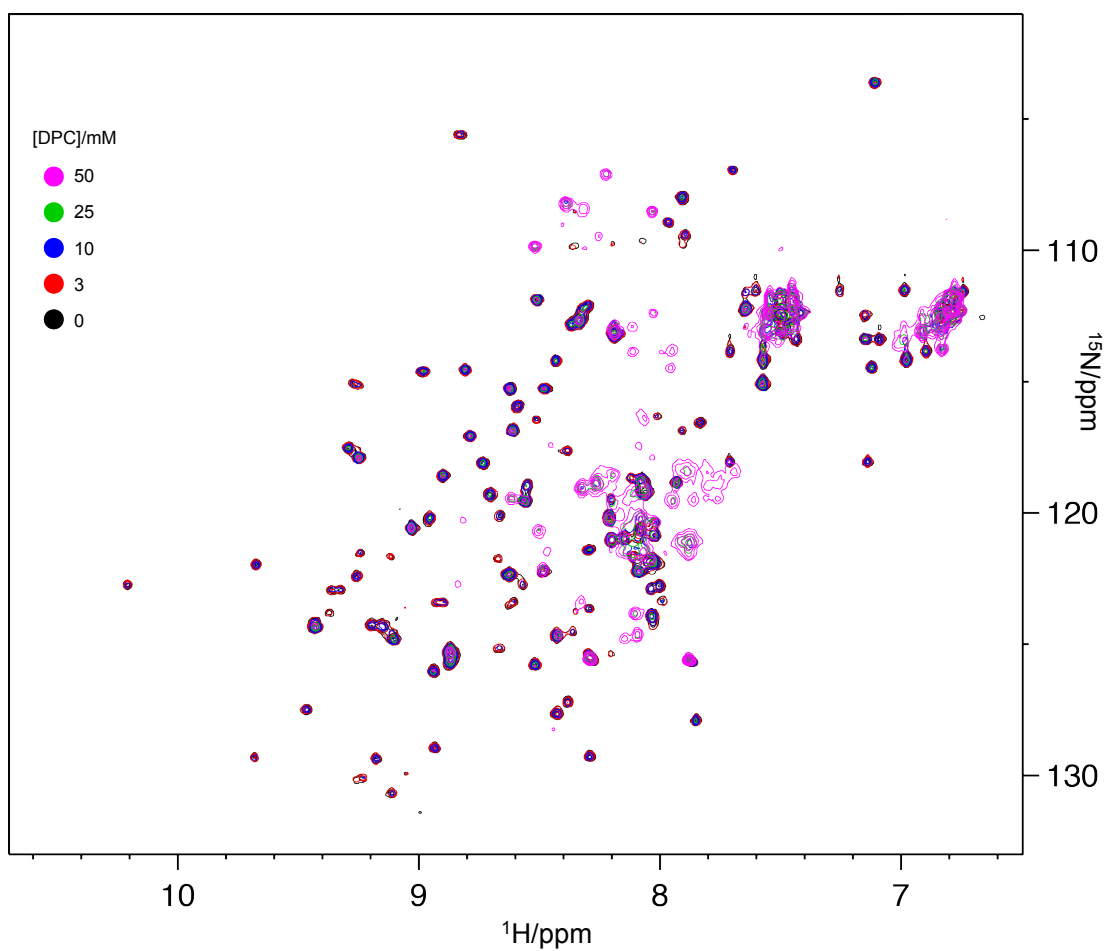

**Figure S12.** Interaction of the C2 D429N mutant with DPC micelles. Overlay of  $^1\text{H}$ - $^{15}\text{N}$  SOFAST-HMQC spectra of  $150\ \mu\text{M}$   $^{15}\text{N}$ -labelled C2 D429N mutant recorded with increasing [DPC] at  $30\ \text{mM}$   $[\text{Ca}^{2+}]$ . Spectra were processed identically and plotted with the same contour levels. Resonance colours correspond to different [DPC] shown in the same colour on the left side of spectra. No significant CSPs upon adding DPC were observed and resonances indicative of degradation or aggregation gradually increased with increasing [DPC].

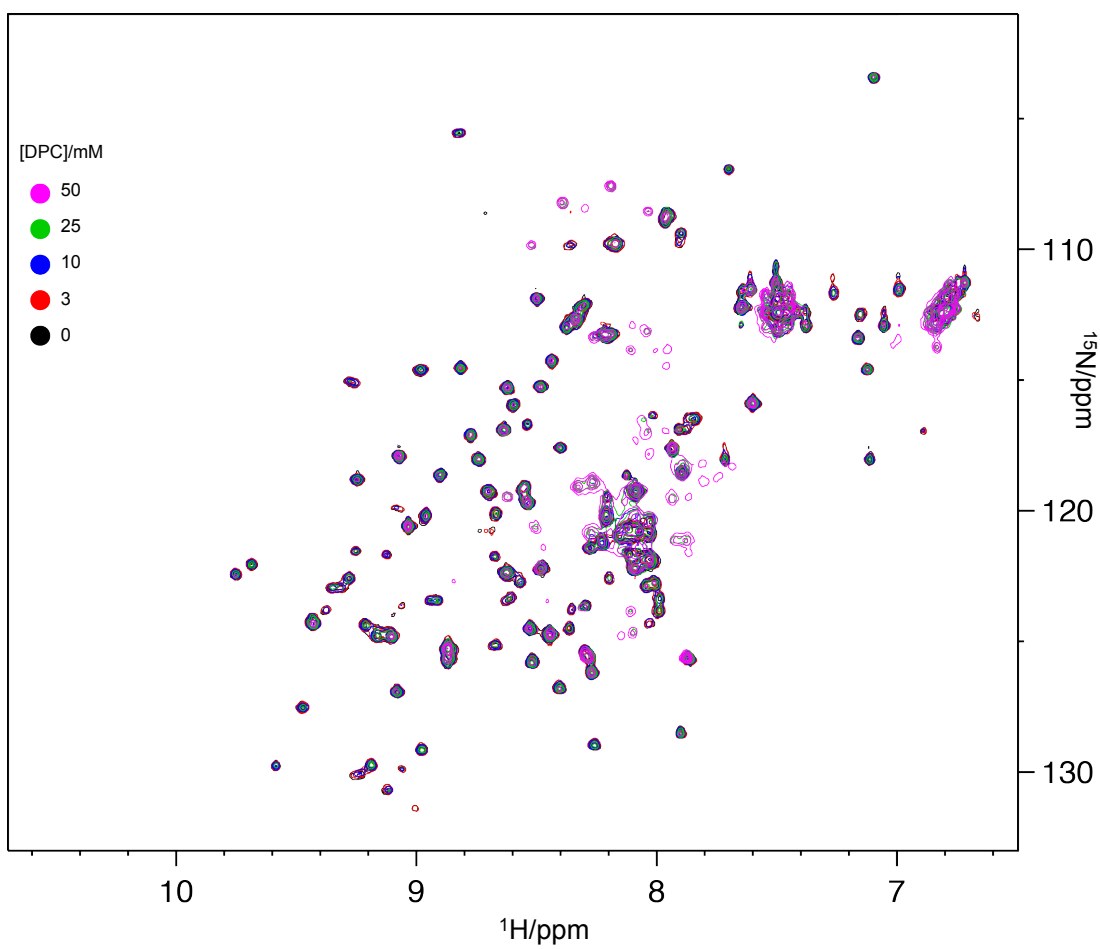

**Figure S13.** Interaction of the C2 D435N mutant with DPC micelles. As per Figure S12, except for  $150\ \mu\text{M}$   $^{15}\text{N}$ -labelled C2 D435N mutant.

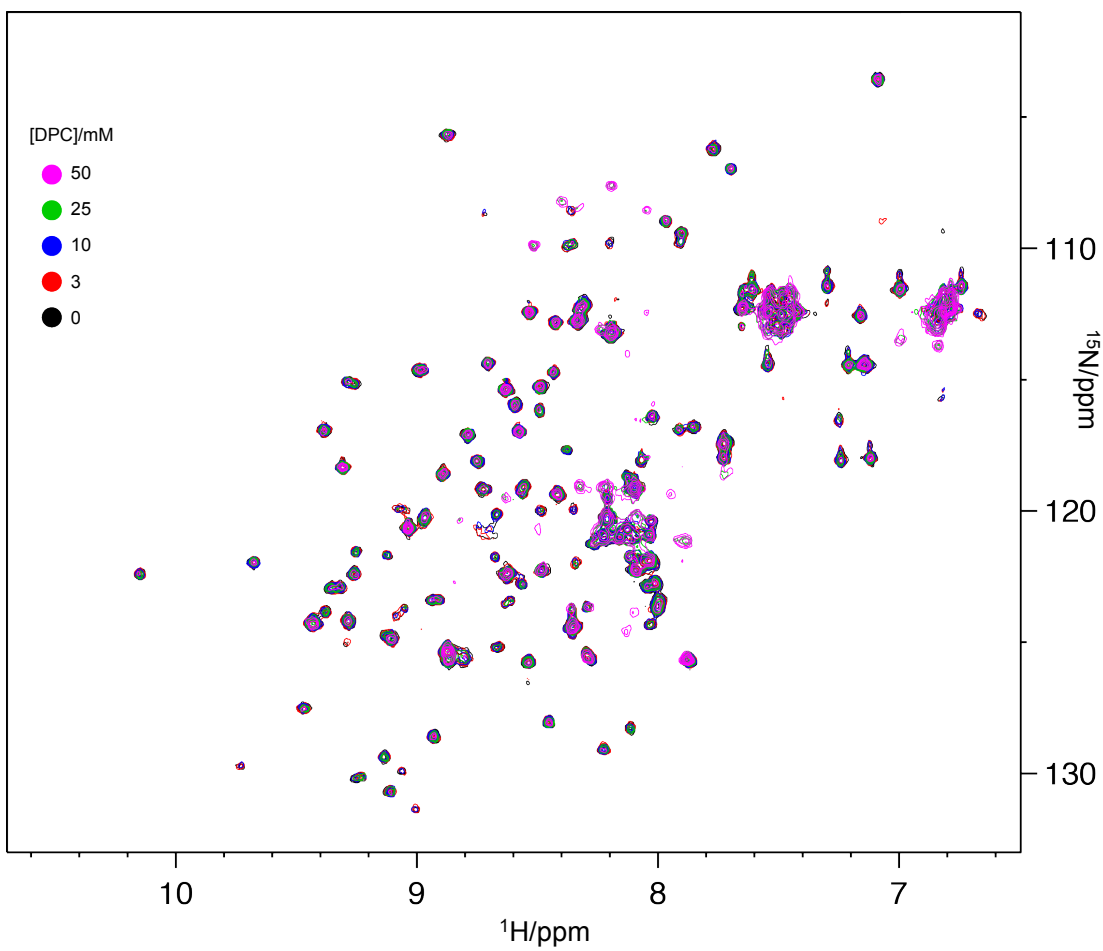

**Figure S14.** Interaction of the C2 D483N mutant with DPC micelles. As per Figure S12, except for 150  $\mu\text{M}$   $^{15}\text{N}$ -labelled C2 D483N mutant.



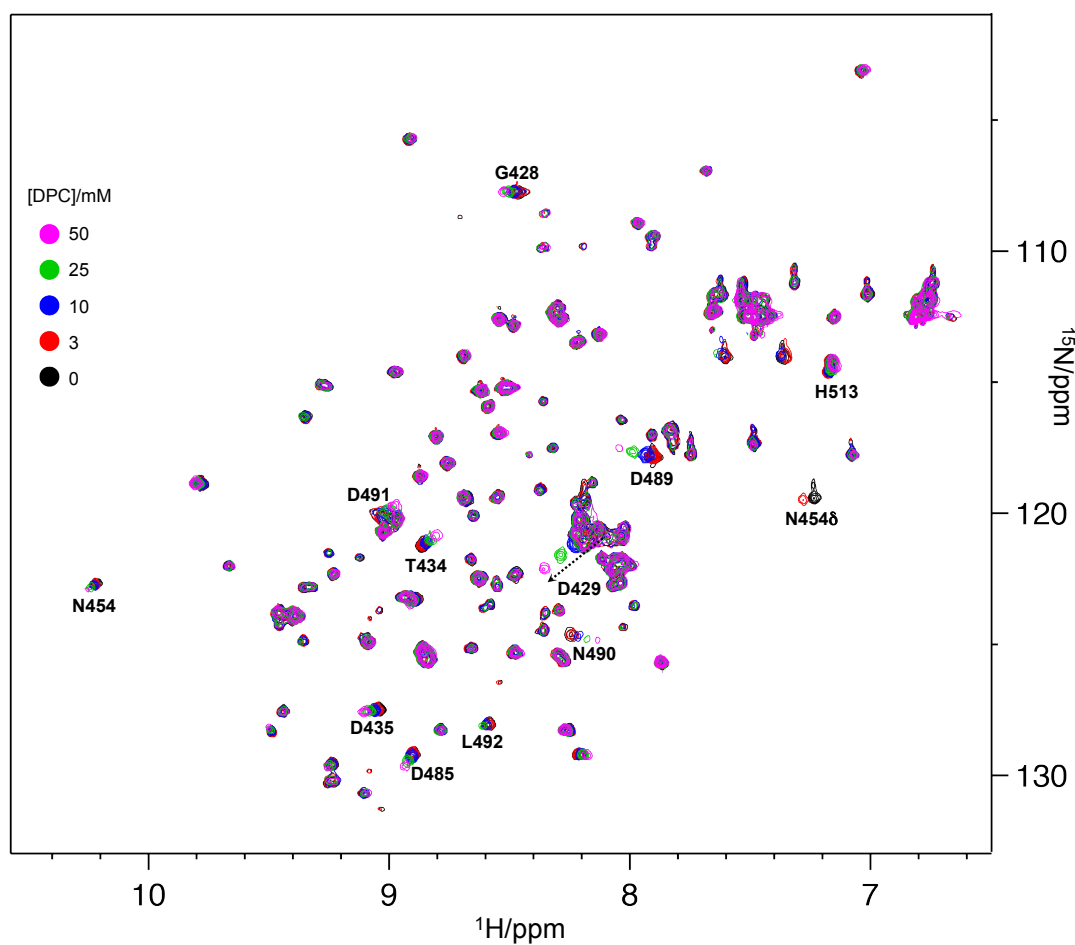

**Figure S15.** Interaction of the C2 D490N mutant with DPC micelles. Overlay of  $^1\text{H}$ - $^{15}\text{N}$  SOFAST-HMQC spectra of  $150\ \mu\text{M}$   $^{15}\text{N}$ -labelled C2 D490N mutant recorded with increasing [DPC] at  $30\ \text{mM}$   $[\text{Ca}^{2+}]$  concentration. Spectra were processed identically and plotted with the same contour levels. Resonance colours correspond to different [DPC] shown in the same colour on the left side of spectra. Significantly perturbed resonances upon addition of DPC are labelled. The same resonances of the C2 quad<sub>410-526</sub> were perturbed with increasing [DPC].
